# 1     **The ubiquity of directional and reciprocating motion in enzymes out of equilibrium**

2                                  David R. Slochower and Michael K. Gilson\*

3     Skaggs School of Pharmacy and Pharmaceutical Sciences, University of California San Diego,  
4                                  La Jolla, California 92093-0736, United States

5                                                  \* [mgilson@ucsd.edu](mailto:mgilson@ucsd.edu)

## 6     **Summary paragraph**

7     A biological molecular motor is an enzyme that uses the free energy of an out-of-equilibrium  
8     chemical reaction to drive mechanical motion. This motion must have a specific direction to fulfill  
9     the motor's functional role. For example, a corkscrew-shaped flagellum must rotate in the  
10     appropriate sense to propel the organism. The generation of directional motion appears to be a  
11     complex protein property, and it is not clear how the evolutionary leap from non-motor enzymes  
12     to molecular motors could have occurred. Indeed, the existence of biological molecular motors has  
13     been held up in the popular press as a mark against the theory of evolution<sup>1</sup>. Here, we provide  
14     evidence, based on atomistic simulations and kinetic modeling, that conformational switching of  
15     non-motor enzymes, induced by out-of-equilibrium substrate binding and catalysis, induces motor-  
16     like, directional torsional motions, as well as oar-like, reciprocating motions. Generalizing from  
17     these specific results, we provide an argument that virtually any chiral molecule undergoing  
18     conformational transitions out of equilibrium should be expected to undergo directional rotations  
19     on small and potentially large scales. Thus, the emergence of directional motion did not require an  
20     evolutionary leap. Instead, directional motion was present in the earliest enzymes, and only  
21     evolutionary optimization was needed for highly adapted motor proteins to emerge. Moreover,  
22     because chirality is a *sine qua non* for directional motion, the adaptive value of directional motors  
23     means that chirality itself is adaptive, so the need for directional motion may be one reason for the  
24     prevalence of chiral molecules in living systems. Finally, the ubiquity of driven molecular motions

- 25 in enzymes catalyzing reactions out of equilibrium might help explain why the diffusion constants
- 26 of some enzymes increase with their catalytic rate<sup>2-4</sup>.

27 **Text**

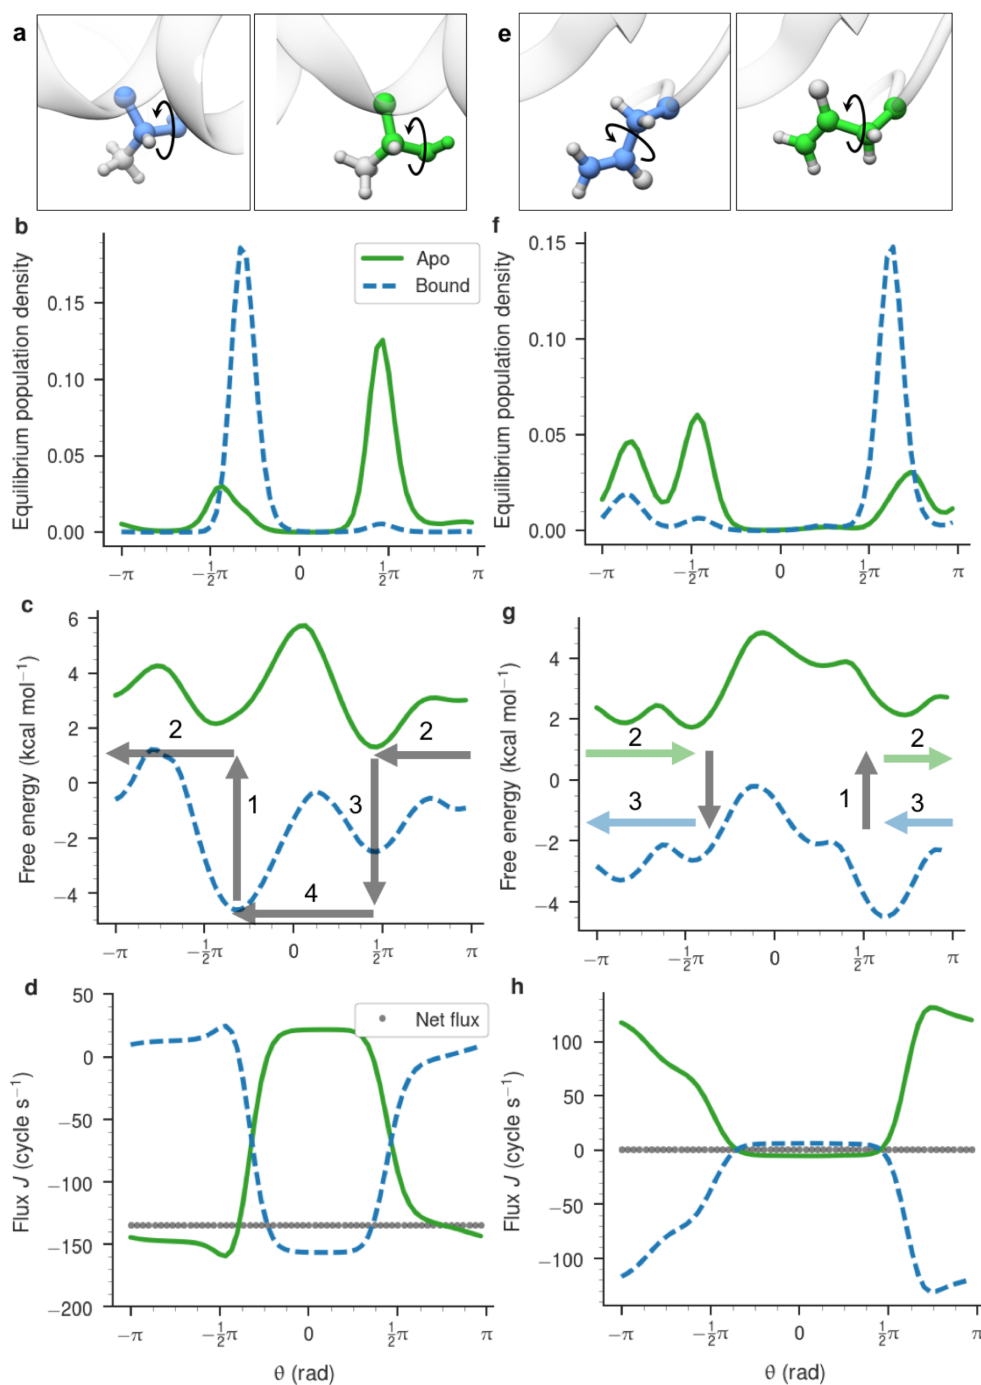

28

29 Figure 1. Protein torsion angles show directional and reciprocating motion. (a) ADK Thr175 in its crystallographic conformations  
 30 for the apo (green) and bound (blue) forms (see Supplementary Methods for PDB accessions) with the  $\chi_2$  angle denoted. The  
 31 coloring is the same for panels a through d. (b) Equilibrium population densities of this angle from MD simulations (Supplementary  
 32 Methods). (c) Free energy surfaces of this angle (Supplementary Methods) derived from the population densities in panel b. Arrows  
 33 indicate the direction of probability flux along, and between, the two surfaces. (d) The probability flux drawn separately for each  
 34 surface and as a sum (grey points), indicating large directional and reciprocating fluxes. (e-h) Same as a-d for ADK Asn138. In all  
 35 cases the substrate concentration is  $10^{-3}$  M.

36 When any enzyme binds a molecule of substrate and catalyzes its conversion to product, it switches  
37 stochastically between two distinct conformational free energy surfaces, one for the apo state and  
38 one for the substrate-bound state. The flashing potential model<sup>5-7</sup>, which has been used to  
39 understand the mechanisms of molecular motors<sup>8-12</sup>, may be used to compute the dynamical  
40 consequences of this switching, given basic enzyme kinetic parameters and knowledge of the two  
41 energy surfaces. We computed the one-dimensional free energy surfaces of protein main- and side-  
42 chain torsions, discretized into bins, from detailed equilibrium molecular dynamics (MD)  
43 simulations of enzymes in their apo and substrate-bound states (Supplementary Methods). These  
44 data, coupled with literature values for the enzyme kinetic parameters (Supplementary Table 1),  
45 enabled us to define first order rate constants for transitions between neighboring bins on and  
46 between surfaces (Extended Data Fig. 1). The resulting set of rate equations was solved for the  
47 non-equilibrium steady state probability distribution across the surfaces. This, in turn, was used to  
48 compute the probability flux on each surface and the net flux,  $J$ , along both surfaces. Nonzero net  
49 flux implies directional rotation. We furthermore evaluated power output and performance under  
50 load by tilting the chemical potential surfaces to generate a torque,  $\tau$ , opposite to the directional  
51 flux, which modifies the intrasurface bin-to-bin rate constants. The power output is the product of  
52 imposed torque and flux:  $P = \tau J$ . Both the maximum power and the stall torque,  $\tau_{\text{stall}}$ , which brings  
53 the directional flux to zero, were found by scanning across values of applied torque.

54 We used this method to analyze motions in three enzymes, each with distinctive characteristics:  
55 adenylylate kinase (ADK), with 214 residues and a relatively high  $k_{\text{cat}} \sim 300 \text{ s}^{-1}$ <sup>13,14</sup>, undergoes  
56 extensive conformational change on binding substrate, with two domains reorienting to form a  
57 compact conformation<sup>15,16</sup>; protein kinase A (PKA), with 350 residues and  $k_{\text{cat}} \sim 140 \text{ s}^{-1}$ <sup>17</sup>, acts as  
58 a “dynamic switch”, with long-range allosteric interactions and domain rearrangement upon ligand

59 binding<sup>18</sup>; while HIV-1 protease (HIVP), with 200 residues and lower  $k_{\text{cat}} \sim 10 \text{ s}^{-1}$ <sup>19-21</sup>, contains  
60 two flexible flaps that lose mobility in the substrate-bound state<sup>22,23</sup> (Extended Data Fig. 2).  
61 The present analysis indicates that torsions in all three enzymes exhibit directional torsional flux,  
62 driven by the catalytic conversion of substrate to product. The general mechanism by which  
63 directional flux is generated is illustrated by the  $\chi_2$  torsion of ADK Thr175 (Fig. 1a). This angle  
64 has a two-peaked probability distribution in both the bound and apo states, but the peak near  $+\frac{\pi}{2}$   
65 is favored in the apo state, while that near  $-\frac{\pi}{2}$  is favored in the bound state (Fig. 1b,c). In the  
66 presence of substrate, the bound-state energy minimum near  $-\frac{\pi}{2}$  is highly occupied (Fig. 1b,c).  
67 Catalytic breakdown of substrate pumps the system to the secondary energy minimum of the apo  
68 state at  $-\frac{\pi}{2}$  (Fig. 1c, arrow 1). Probability then flows primarily to the left on the apo surface,  
69 because this is the lowest-barrier path to the apo state's global energy minimum near  $+\frac{\pi}{2}$  (arrow  
70 2; this flux goes through the periodic boundary at  $\theta = -\pi \equiv +\pi$ ). Probability pooled in the global  
71 energy minimum of the apo state near  $+\frac{\pi}{2}$ , then flows primarily to the bound state, by binding  
72 substrate and landing in the secondary energy minimum of the bound state (arrow 3). It then flows  
73 back to the global minimum of the bound state via the lowest-barrier path, which is again leftward  
74 (arrow 4). The net effect is a leftward flux of up to  $-140 \text{ cycles s}^{-1}$ . Fig. 1d shows the steady state  
75 flux on each surface: leftward flux predominates overall, but occurs on the apo surface between  
76  $-\frac{\pi}{2}$  to  $+\frac{\pi}{2}$ , and on the bound surface elsewhere, with crossovers between surfaces at the energy  
77 minima. This process parallels flashing potential mechanisms previously invoked to explain highly  
78 evolved molecular motors<sup>7,8,11,12,24-27</sup>. In the absence of significant directional flux, a torsion can  
79 still be actively driven back and forth between two angular ranges. For example,  $\chi_2$  of Asn 138 in

80 ADK (Fig. 1e) has essentially zero net flux but undergoes cycles of driven, reciprocating flux, with  
 81 intrasurface fluxes reaching 130 cycles  $s^{-1}$  (Fig. 1d-h).

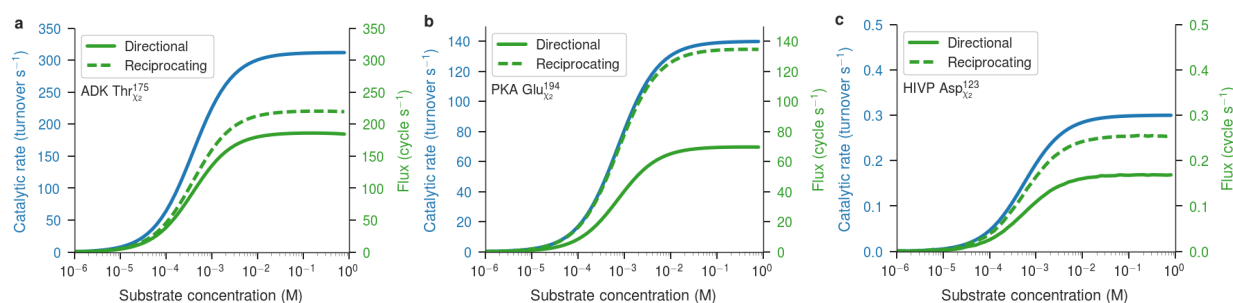

82  
 83 Figure 2. Dependence of catalytic rates and of the magnitudes of driven and directional fluxes on substrate concentration, for torsion  
 84 angles in each enzyme. (a) The  $\chi_2$  angle of Thr175 in ADK reaches high levels of both directional and reciprocating flux. (b) The  
 85  $\chi_2$  angle of Glu194 in PKA reaches a high level of reciprocating flux and moderate level of directional flux. (c) Although the total  
 86 amount of flux in the  $\chi_2$  angle of Asp123 in HIVP is low, the ratio of directional and reciprocating flux to the enzyme velocity is  
 87 similar to that in ADK and PKA.

88 The fluxes are driven by catalytic breakdown of substrate: they are zero without substrate and rise  
 89 sigmoidally with substrate concentration, along with the catalytic rate, as illustrated in Fig. 2 and  
 90 Extended Data Fig. 3. Although the maximum directional fluxes in these examples are quite  
 91 different for ADK, PKA and HIVP (180, 70 and 0.18 cycles  $s^{-1}$ , respectively), the ratios of flux to  
 92 catalytic rate are similar, 0.5 – 0.6 cycles/catalytic turnover. This ratio is akin to a 2:1 gearing of  
 93 catalysis to torsional rotation.

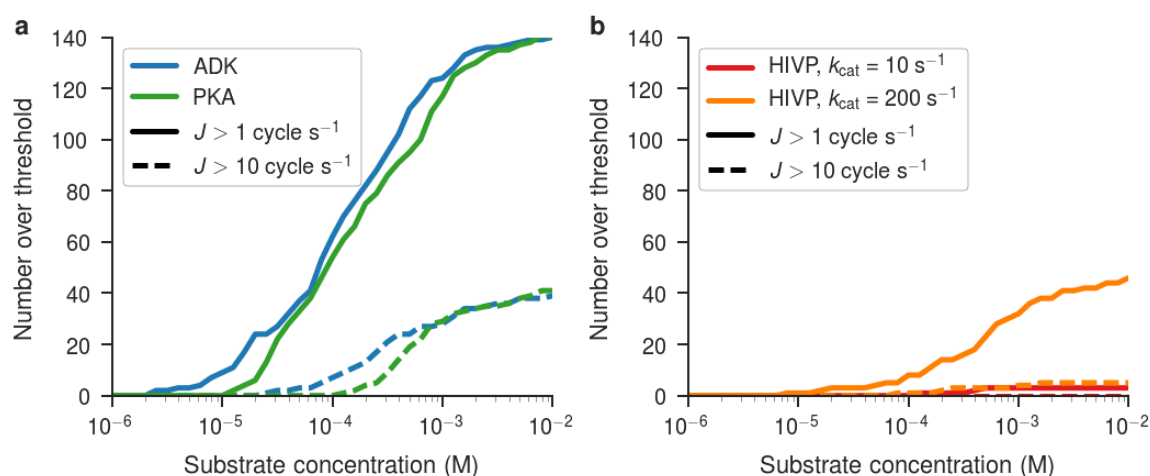

94

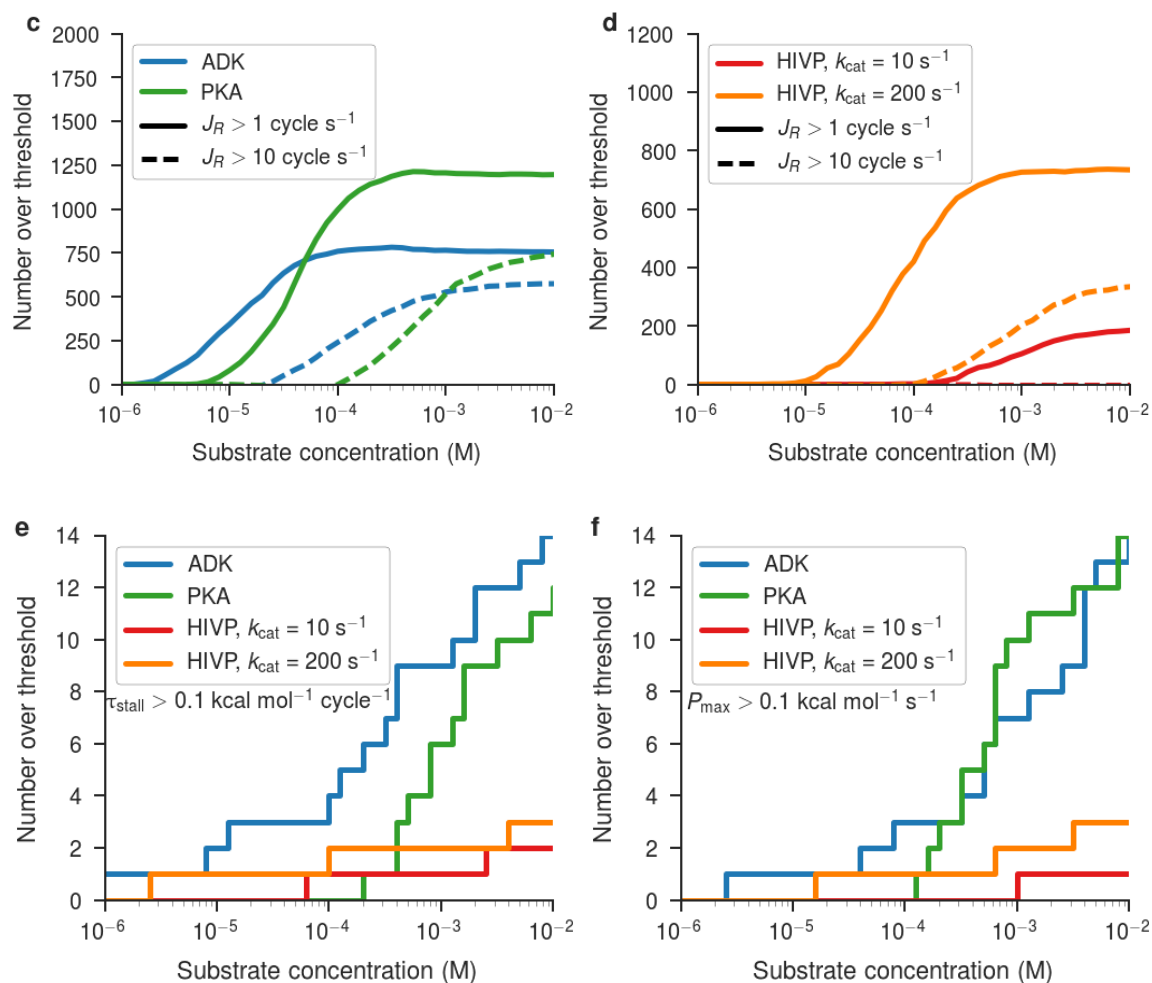

95

96

97 Figure 3. The number of torsions above various thresholds of directional flux magnitude, reciprocating flux magnitude, stall torque,  
 98 and maximum power, as a function of substrate concentration. (a-b) The number of torsions with directional flux above 1 (solid)  
 99 or 10 (dotted) cycle  $s^{-1}$  in ADK, PKA, and HIVP. (c-d) The number of torsions with reciprocating flux above 1 (solid) or 10 (dotted)  
 100 cycle  $s^{-1}$  and, at the same time, directional flux less than 1 cycle  $s^{-1}$ . The number of angles with (e) maximum stall force above 0.1  
 101 kcal/(mol-cycle) and (f) power above 0.1 kcal/(mol- $s^{-1}$ ).

102 In addition to torsions with fluxes that approach the catalytic rate, each enzyme also has many  
 103 torsions with a lower but definite directional or reciprocating flux. Thus, at high substrate  
 104 concentration, about 40 torsions in ADK are found to rotate faster than 10 cycle  $s^{-1}$ , and about 140  
 105 are found to rotate faster than 1 cycle  $s^{-1}$  (Fig. 3a). The corresponding numbers are lower for HIVP  
 106 (Fig. 3b, red). This largely reflects the lower  $k_{cat}$  value of HIVP, about 10  $s^{-1}$ <sup>19-21</sup> compared with  
 107 200-300  $s^{-1}$  for PKA<sup>17,28</sup> and ADK<sup>13,14</sup>. Thus, artificially assigning  $k_{cat} = 200$   $s^{-1}$  to HIVP leads  
 108 to substantial increases in the number of torsions with fluxes of at least 10  $s^{-1}$  and at least 1  $s^{-1}$  (Fig.

109 3b, orange and Extended Data Fig. 4). This means that many of the torsional PDFs in HIVP  
110 generate low fluxes primarily because  $k_{\text{cat}}$  is low for this enzyme. The tendency toward lower  
111 fluxes in HIVP may also reflect the smaller scale of its conformational changes (Extended Data  
112 Fig. 2). In addition to torsions with net directional flux  $>0.1$  cycles  $\text{s}^{-1}$ , many torsions are predicted  
113 to undergo large reciprocating fluxes. Indeed, ADK and PKA are predicted to have  $\sim 1250$  and  
114  $\sim 750$  torsions whose reciprocating motions occur at rates of at least  $1$  cycle  $\text{s}^{-1}$  with minimal  
115 concomitant directional flux (Fig. 3c,d). These angles are distributed throughout the proteins, with  
116 high flux torsions localized near the substrate binding pocket or mobile regions (Extended Data  
117 Fig. 2).

118 The directional torsions in these enzymes can do work against small mechanical loads and thus  
119 generate power (Fig. 3e,f). At high substrate concentrations, torsions in ADK and PKA are  
120 predicted to generate stall torques up to  $2.4$  and  $1.6$  kcal  $\text{mol}^{-1}$  cycle $^{-1}$ , respectively, and maximum  
121 power outputs per torsion of  $70$  and  $28$  kcal  $\text{mol}^{-1}$   $\text{s}^{-1}$ .

122 Directional flux can be generated only by a chiral molecule. Otherwise, the energy surfaces of the  
123 torsions would not distinguish between flux to the right (e.g., clockwise) and flux to the left  
124 (counterclockwise), so there would be no physical basis for net motion in one direction. Indeed,  
125 as illustrated in the Extended Data Fig. 5, artificially symmetrizing the energy surfaces of a torsion  
126 angle abolishes directional flux, though substantial reciprocating fluxes can remain.

127 The central result of this study is that enzymes not normally regarded as motor proteins can have  
128 motor-like properties: in the presence of excess substrate, they exhibit not only driven  
129 reciprocating motions but also directional rotation. Furthermore, the specific findings for ADK,  
130 PKA, and HIVP may be generalized by a simple physical argument based on the same flashing  
131 potential kinetic model. Consider any chiral molecule with a degree of freedom that is switched



132 back and forth between two energy surfaces. After the energy surface is switched, the asymmetry  
133 of the new energy surface means that probability will, in net, flow more in one direction than the  
134 other. When the surface is switched back, a second directional probability flow occurs, this time  
135 on the other energy surface, and only by coincidence will the two probability flows cancel  
136 perfectly, unless a large energy barrier entirely blocks circular motion. The imbalance between the  
137 two flows represents directional flux.

138 Although this study focuses on torsional motions, the same physical reasoning applies to larger  
139 scale conformational motions, so directional motions in enzymes catalyzing reactions out of  
140 equilibrium likely also involve motions through higher-order conformational subspaces. For  
141 example, the concerted opening and closing of an active site could occur along two different paths,  
142 thus exhibiting hysteretic cycling. Such concerted motions might be stronger, in terms of force and  
143 power, than the torsional motions studied here, and their hydrodynamic coupling with solvent  
144 might help explain why some enzymes diffuse faster when catalytically active<sup>2-4,29,30</sup>. We note that,  
145 despite the scallop theorem<sup>31</sup>, driven reciprocating motions could also speed enzyme diffusion if  
146 they occur on time scales slower than the rotational diffusion of the enzyme, which is typically  
147 about 10-100 ns, because then the forward and reverse translations would have different directions.

148 Thus, an enzyme catalyzing a reaction out of equilibrium can undergo directional probability flows  
149 through multiple conformational cycles, as well as driven reciprocating motions. Such motions  
150 could have been the starting points for the evolution of today's efficient motor proteins, and might  
151 also provide footholds for *in vitro* directed evolution of mechanically active enzymes. Additionally,  
152 because directional motion requires chirality, the adaptive advantages of directional motor  
153 proteins, such as in flagellar propulsion, could be one reason that natural selection led to  
154 biomolecules that are chiral.

155 **Methods**

156 Methods, including statements of data availability and any associated accession codes and  
157 references, are available in the online version of the paper. The datasets generated and analyzed  
158 during the current study are available in the GitHub repository  
159 <https://github.com/GilsonLabUCSD/nonequilibrium>.

160

161 Code availability

162 The Python code used to analyze the simulation data and implement the kinetic model is available  
163 at the same GitHub repository.

164

165

166 **Acknowledgements**

167 We thank Dr. N.-L. Huang for assistance preparing simulations on ADK and HIVP, and Drs. A.  
168 Gilson, K. Lindenberg, C. Van den Broeck, and J.A. McCammon for theoretical discussions. This  
169 work was funded in part by grant GM061300 from the National Institutes of Health (NIH). Its  
170 contents are solely the responsibility of the authors and do not necessarily represent the official  
171 views of the NIH.

172 **Author Contributions**

173 M.K.G. conceived and designed the project. D.R.S. implemented the model and performed the  
174 simulations. M.K.G. and D.R.S. analyzed the data and wrote the manuscript.

175 **Author Information**

176 MKG has an equity interest in and is a cofounder and scientific advisor of VeraChem, LLC.

177

178 **References**

179 1 Pallen, M. J. & Matzke, N. J. From The Origin of Species to the origin of bacterial flagella.

180 *Nat. Rev. Microbiol.* **4**, 784-790, doi:10.1038/nrmicro1493 (2006).

181 2 Muddana, H. S., Sengupta, S., Mallouk, T. E., Sen, A. & Butler, P. J. Substrate catalysis

182 enhances single-enzyme diffusion. *J. Am. Chem. Soc.* **132**, 2110-2111,

183 doi:10.1021/ja908773a (2010).

184 3 Sengupta, S. *et al.* Enzyme molecules as nanomotors. *J. Am. Chem. Soc.* **135**, 1406-1414,

185 doi:10.1021/ja3091615 (2013).

186 4 Riedel, C. *et al.* The heat released during catalytic turnover enhances the diffusion of an

187 enzyme. *Nature* **517**, 227-230, doi:10.1038/nature14043 (2015).

188 5 Astumian, R. D. Thermodynamics and kinetics of a Brownian motor. *Science* **276**, 917-

189 922 (1997).

190 6 Astumian, R. D. & Bier, M. Fluctuation driven ratchets: Molecular motors. *Phys Rev Lett*

191 **72**, 1766-1769, doi:10.1103/PhysRevLett.72.1766 (1994).

192 7 Kay, E. R., Leigh, D. A. & Zerbetto, F. Synthetic molecular motors and mechanical

193 machines. *Angew Chem Int Ed Engl* **46**, 72-191, doi:10.1002/anie.200504313 (2007).

194 8 Wang, H. & Oster, G. Ratchets, power strokes, and molecular motors. *Applied Physics A*

195 **75**, 315-323, doi:10.1007/s003390201340 (2002).

196 9 Astumian, R. D. Optical vs. chemical driving for molecular machines. *Faraday Discuss.*,

197 doi:10.1039/c6fd00140h (2016).

- 198 10 Astumian, R. D. Stochastic conformational pumping: a mechanism for free-energy  
199 transduction by molecules. *Annu Rev Biophys* **40**, 289-313, doi:10.1146/annurev-biophys-  
200 042910-155355 (2011).
- 201 11 Astumian, R. D. Enhanced diffusion, chemotaxis, and pumping by active enzymes:  
202 progress toward an organizing principle of molecular machines. *ACS Nano* **8**, 11917-  
203 11924, doi:10.1021/nn507039b (2014).
- 204 12 Riemann, P. Brownian motors: noisy transport far from equilibrium. *Physics Reports*  
205 (2002).
- 206 13 Aden, J., Verma, A., Schug, A. & Wolf-Watz, M. Modulation of a Pre-existing  
207 Conformational Equilibrium Tunes Adenylate Kinase Activity. *J. Am. Chem. Soc.* **134**,  
208 16562-16570, doi:10.1021/ja3032482 (2012).
- 209 14 Wolf-Watz, M. *et al.* Linkage between dynamics and catalysis in a thermophilic-  
210 mesophilic enzyme pair. *Nat. Struct. Mol. Biol.* **11**, 945-949, doi:10.1038/nsmb821 (2004).
- 211 15 Gerstein, M., Schulz, G. & Chothia, C. Domain closure in adenylate kinase. Joints on either  
212 side of two helices close like neighboring fingers. *J. Mol. Biol.* **229**, 494-501,  
213 doi:10.1006/jmbi.1993.1048 (1993).
- 214 16 Hanson, J. A. *et al.* Illuminating the mechanistic roles of enzyme conformational dynamics.  
215 *Proc Natl Acad Sci U S A* **104**, 18055-18060, doi:10.1073/pnas.0708600104 (2007).
- 216 17 Adams, J. A. Kinetic and catalytic mechanisms of protein kinases. *Chem Rev* **101**, 2271-  
217 2290 (2001).
- 218 18 McClendon, C. L., Kornev, A. P., Gilson, M. K. & Taylor, S. S. Dynamic architecture of  
219 a protein kinase. *Proc Natl Acad Sci U S A* **111**, E4623-4631,  
220 doi:10.1073/pnas.1418402111 (2014).

- 221 19 Wondrak, E. M., Louis, J. M. & Oroszlan, S. The Effect of Salt on the Michaelis Menten  
222 Constant of the Hiv-1 Protease Correlates with the Hofmeister Series. *FEBS Lett.* **280**, 344-  
223 346, doi:Doi 10.1016/0014-5793(91)80327-Y (1991).
- 224 20 Windsor, I. W. & Raines, R. T. Fluorogenic Assay for Inhibitors of HIV-1 Protease with  
225 Sub-picomolar Affinity. *Sci Rep* **5**, 11286, doi:10.1038/srep11286 (2015).
- 226 21 Pokorna, J., Heyda, J. & Konvalinka, J. Ion specific effects of alkali cations on the catalytic  
227 activity of HIV-1 protease. *Faraday Discuss* **160**, 359-370; discussion 389-403 (2013).
- 228 22 Scott, W. R. P. & Schiffer, C. A. Curling of Flap Tips in HIV-1 Protease as a Mechanism  
229 for Substrate Entry and Tolerance of Drug Resistance. *Structure* **8**, 1259-1265,  
230 doi:10.1016/S0969-2126(00)00537-2 (2000).
- 231 23 Kurt, N., Scott, W. R. P., Schiffer, C. A. & Haliloglu, T. Cooperative fluctuations of  
232 unliganded and substrate-bound HIV-1 protease: A structure-based analysis on a variety of  
233 conformations from crystallography and molecular dynamics simulations. *Proteins* **51**,  
234 409-422, doi:10.1002/prot.10350 (2003).
- 235 24 Coskun, A., Banaszak, M., Astumian, R. D., Stoddart, J. F. & Grzybowski, B. A. Great  
236 expectations: can artificial molecular machines deliver on their promise? *Chem Soc Rev*  
237 **41**, 19-30, doi:10.1039/c1cs15262a (2012).
- 238 25 Howard, J. Motor Proteins as Nanomachines: The Roles of Thermal Fluctuations in  
239 Generating Force and Motion. *Seminaire Poincare* (2009).
- 240 26 Bustamante, C., Keller, D. & Oster, G. The physics of molecular motors. *Acc Chem Res*  
241 **34**, 412-420 (2001).
- 242 27 Keller, D. & Bustamante, C. The mechanochemistry of molecular motors. *Biophys. J.* **78**,  
243 541-556, doi:10.1016/S0006-3495(00)76615-X (2000).

- 244 28 Shaffer, J. & Adams, J. A. An ATP-linked structural change in protein kinase A precedes  
245 phosphoryl transfer under physiological magnesium concentrations. *Biochemistry* **38**,  
246 5572-5581, doi:10.1021/bi982768q (1999).
- 247 29 Bai, X. & Wolynes, P. G. On the hydrodynamics of swimming enzymes. *J Chem Phys* **143**,  
248 165101, doi:10.1063/1.4933424 (2015).
- 249 30 Hwang, W. & Hyeon, C. Quantifying the Heat Dissipation from a Molecular Motor's  
250 Transport Properties in Nonequilibrium Steady States. *J Phys Chem Lett* **8**, 250-256,  
251 doi:10.1021/acs.jpcelett.6b02657 (2017).
- 252 31 Purcell, E. M. Life at Low Reynolds-Number. *American Journal of Physics* **45**, 3-11,  
253 doi:Doi 10.1119/1.10903 (1977).
- 254
